# Supplementary material
Source: PubMed Central journal article supplement (PMC2794237)
Supplement: ASN.2009030283_1.pdf [file ASN.2009030283_1.pdf]

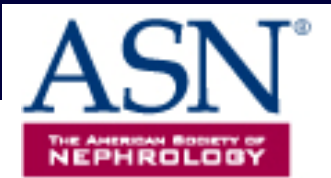

1725 I Street NW • Suite 510 • Washington, DC 20006  
Tel 202-659-0599 • Fax 202-659-0709 • [www.asn-online.org](http://www.asn-online.org)

## **EMBARGOED FOR RELEASE UNTIL 5:00 PM ET ON OCTOBER 29**

**Contact:** Shari Leventhal: 202-416-0658, [sleventhal@asn-online.org](mailto:sleventhal@asn-online.org)

### **LOW VITAMIN D LEVELS EXPLAINS MOST ESRD RISK IN AFRICAN AMERICANS**

*Future Studies Will Tell Whether Raising Vitamin D Levels Can Slow Kidney Disease*

**Washington, DC (October 26, 2009)** — Low levels of vitamin D may account for nearly 60 percent of the elevated risk of end-stage renal disease (ESRD) in African Americans, according to a report in the December *Journal of the American Society of Nephrology* (JASN). "Our study adds to previous evidence linking vitamin D deficiency to the progression of kidney disease and the need for dialysis," comments Michal L. Melamed, MD, of Albert Einstein College of Medicine (Bronx, NY). "It also explains a fair amount of the increased risk of ESRD in African Americans." Vitamin D is obtained from sun exposure, food and food supplements.

Melamed and colleagues analyzed a nationwide sample of 13,000 Americans, including measurements of the vitamin D metabolite 25(OH)D. Medicare data were used to identify participants who eventually required dialysis therapy for ESRD. "We found that the participants with the lowest 25(OH)D levels were 2.6 times as likely to end up on dialysis compared to those with higher levels," says Melamed.

The researchers then tested whether 25(OH)D levels could contribute to the higher risk of ESRD in African Americans, compared to whites. "African Americans have lower 25(OH)D levels and a higher risk of ESRD," Melamed explains. "We found that 25(OH)D deficiency was responsible for about 58 percent of the excess risk for ESRD experienced by African Americans."

Vitamin D deficiency is a very common problem in the United States. In recent years, studies have linked low vitamin D to many different health problems, including diabetes, high blood pressure, cancers, and heart disease. The new results add to previous evidence that low 25(OH)D levels are an important risk factor for ESRD. "This is another good reason to make sure that people get enough vitamin D," Melamed adds.

Although it can't prove any cause-and-effect relationship, the study also suggests that vitamin D deficiency is a key contributor to the high risk of ESRD in African Americans. More research is needed to confirm these findings, and to determine whether treatment to raise low vitamin D levels can help to

**MORE**

preserve kidney function. "We are currently in the process of enrolling for a clinical trial of vitamin D repletion in patients with chronic kidney disease to further test these hypotheses," says Melamed.

Dr. Melamed's research will also be presented as part of a Poster Session during ASN Renal Week on October 30, 2009. This poster presentation is entitled, "25-Hydroxyvitamin D Levels and Progressive Kidney Disease: Contribution to the Excess Risk of ESRD in Non-Hispanic Blacks" (F-PO1101).

Other authors included Paul Muntner, PhD (University of Alabama at Birmingham); Thomas Hostetter, MD (also of Albert Einstein College of Medicine); Erin Michos, MD; Brad Astor, PhD (Johns Hopkins School of Medicine); and Neil R. Powe, MD, MBA, FASN (University of California- San Francisco). Dr Hostetter has consulted for Bristol Myers Squibb, Eli Lilly, and Wyeth. None of the other co-authors reported financial disclosures.

The study entitled, "25-Hydroxyvitamin D Levels, Race, and the Progression of Kidney Disease," will appear in an upcoming issue of JASN, and online at <http://jasn.asnjournals.org/> on October 29, 2009, doi 10.1681/ASN.2009030283.

The American Society of Nephrology (ASN) does not offer medical advice. All content in ASN publications is for informational purposes only, and is not intended to cover all possible uses, directions, precautions, drug interactions, or adverse effects. This content should not be used during a medical emergency or for the diagnosis or treatment of any medical condition. Please consult your doctor or other qualified health care provider if you have any questions about a medical condition, or before taking any drug, changing your diet or commencing or discontinuing any course of treatment. Do not ignore or delay obtaining professional medical advice because of information accessed through ASN. Call 911 or your doctor for all medical emergencies.

Founded in 1966, ASN is the world's largest professional society devoted to the study of kidney disease. Comprised of 11,000 physicians and scientists, ASN continues to promote expert patient care, to advance medical research, and to educate the renal community. ASN also informs policymakers about issues of importance to kidney doctors and their patients. ASN funds research, and through its world-renowned meetings and first-class publications, disseminates information and educational tools that empower physicians.

###
